# Supplementary material for: A Multidisciplinary Approach to Investigate Deep-Pelagic Ecosystem Dynamics in the Gulf of Mexico Following Deepwater Horizon
Source: Frontiers journal article supplement (doi:10.3389/fmars.2020.548880), 2020-12-29
Supplement: Table_5.docx [file Table_5.docx]

**Supplementary Material**

Supplemental Table 5. List of publicly available datasets from ONSAP and DEEPEND available through the Gulf of Mexico Research Initiative Information and Data Cooperative (<https://data.gulfresearchinitiative.org/>).

| Dataset type | Dataset Title | DOI |
| --- | --- | --- |
| CTD | Conductivity, temperature and depth (CTD) data for DEEPEND stations, cruise DP03, May 2016 | 10.7266/N7R49P43 |
| CTD | Conductivity, temperature and depth (CTD) data for DEEPEND stations, cruise DP04, August 2016 | 10.7266/N7MC8XDC |
| CTD | Conductivity, temperature, and depth (CTD) data for DEEPEND stations on cruise DP06, July-August 2018 | 10.7266/n7-ceq1-5g82 |
| CTD | Conductivity, temperature, and depth (CTD) data for DEEPEND stations, cruise DP05, May 2017 | 10.7266/N7GM85P1 |
| CTD | CTD data salinity, temperature, depth for Cruise DP01 R/V Point Sur in-situ deep seawater and associated fauna, May 1-8, 2015, Viosca Knoll GoM. | 10.7266/N73R0QSX |
| CTD | CTD data salinity, temperature, depth for Cruise DP02 R/V Point Sur in-situ deep seawater and associated fauna, August 8-22, 2015, Viosca Knoll GoM | 10.7266/N7PV6HS1 |
| Glider | Salinity and temperature measurements from an oceanographic glider deployed in coordination with DEEPEND Cruise DP04, August 2016 | 10.7266/N7Q52N08 |
| Glider | Salinity and temperature measurements from an oceanographic glider deployed in coordination with DEEPEND cruise DP05, April-May 2017 | 10.7266/N7KD1W8J |
| Glider | Salinity and temperature measurements from an oceanographic glider deployed in the northeastern Gulf of Mexico, cruise DP02, August 2015 | 10.7266/N7VM49MP |
| HYCOM | Habitat classification of the Gulf of Mexico (GOM) using the HYbrid Coordinate Ocean Model (HYCOM) and salinity/temperature profiles, cruises DP01-DP04, May 2015 to August 2016 | 10.7266/N7QR4VK0 |
| HYCOM | Numerical simulation of the Gulf of Mexico (GOM) using the HYbrid Coordinate Ocean Model (HYCOM) from January to December 2015 | 10.7266/N7X065FZ |
| HYCOM | Numerical simulation of the Gulf of Mexico (GOM) using the HYbrid Coordinate Ocean Model (HYCOM) from January to December 2016 | 10.7266/N70K26W5 |
| HYCOM | Numerical simulation of the Gulf of Mexico (GOM) using the HYbrid Coordinate Ocean Model (HYCOM) from January to December 2017 | 10.7266/n7-77gs-w736 |
| MOC10 | Multiple Opening Closing Net Environmental Sensing System (MOCNESS) instrument data for Cruise DP01 R/V Point Sur in-situ deep seawater and associated fauna, May 1-8, 2015, Viosca Knoll GoM | 10.7266/N7FF3QFK |
| MOC10 | Multiple Opening Closing Net Environmental Sensing System (MOCNESS) instrument data for Cruise DP02 R/V Point Sur in-situ deep seawater and associated fauna, August 9-21, 2015, Viosca Knoll GoM | 10.7266/N7610XD5 |
| MOC10 | Multiple Opening Closing Net Environmental Sensing System (MOCNESS) instrument data for Cruise DP03 R/V Point Sur in-situ deep seawater and associated fauna, April 30 - May 16, 2016, Viosca Knoll Gulf of Mexico | 10.7266/N72805Q8 |
| MOC10 | Multiple Opening Closing Net Environmental Sensing System (MOCNESS) instrument data for Cruise DP04 R/V Point Sur in-situ deep seawater and associated fauna, August 5-18, 2016, Viosca Knoll Gulf of Mexico | 10.7266/N7XG9P7F |
| MOC10 | Multiple Opening Closing Net Environmental Sensing System (MOCNESS) instrument data for Cruise DP05 R/V Point Sur in-situ deep seawater and associated fauna, May 1-11, 2017, Viosca Knoll GoM | 10.7266/N7JD4V45 |
| MOC10 | Multiple Opening Closing Net Environmental Sensing System (MOCNESS) instrument data for Cruise DP06 R/V Point Sur in-situ deep seawater and associated fauna, July 19- August 1 2018, Viosca Knoll GoM | 10.7266/n7-j3c9-4s47 |
| Optics | Near surface fluorescence and optical scattering profiles at CTD sampling stations. Cruises DP01 and DP02 from May 2015 - August 2015 | 10.7266/N7TM78J6 |
| Remote Sensing | Spectral remote sensing reflectance of the water surface collected at multiple stations on cruises DP01 and DP02, May-August 2015 | 10.7266/N7ZC818X |
| Remote Sensing | Spectral remote sensing reflectance of the water surface collected at multiple stations on cruises DP03 and DP04, May-August 2016 | 10.7266/N7NC5ZK6 |
| Remote Sensing | Spectral remote sensing reflectance of the water surface collected at multiple stations, cruise DP05, May 2017 | 10.7266/N7ZK5F24 |
| Acoustic | DEEPEND: Raw acoustic scattering data of organisms from the water column. Cruise DP06 from January 2018 – December 2018. | 10.7266/n7-bhzk-nh73 |
| Acoustic | Raw acoustic scattering data of organisms from the water column, cruise DP03 - April-May 2016 | 10.7266/N7CN729W |
| Acoustic | Raw acoustic scattering data of organisms from the water column, cruise DP04 - August 2016 | 10.7266/N7H41PX6 |
| Acoustic | Raw acoustic scattering data of organisms from the water column, cruise DP05, April 2017 – May 2017 | 10.7266/N7474871 |
| Acoustic | Raw acoustic scattering data of organisms from the water column, R/V Point Sur, cruise DP01, May 1 - 8, 2015 | 10.7266/N76T0K11 |
| Acoustic | Raw acoustic scattering data of organisms from the water column, R/V Point Sur, Cruise DP02, August 9-21 2015 | 10.7266/N7BK19RB |
| Nekton DB | Inventory of Gulf oceanic fauna data including species, weight, and measurements. Cruise DP06 August 2018, R/V on the Point Sur in the Northern Gulf of Mexico | 10.7266/n7-ac8e-0240 |
| Nekton DB | Inventory of Gulf oceanic fauna data including species, weight, and measurements. Cruises DP01 May 1-8, 2015 and DP02 August 9-21, 2015 R/V on the Point Sur in the Northern Gulf of Mexico | 10.7266/N70P0X3T |
| Nekton DB | Inventory of Gulf oceanic fauna data including species, weight, and measurements. Meg Skansi cruises from Jan. 25 - Sept. 30, 2011 in the Northern Gulf of Mexico | 10.7266/N7VX0DK2 |
| Nekton DB | Inventory of Gulf of Mexico oceanic fauna data including species, weight, and measurements from R/V Point Sur (Cruises DP03 and DP04) May-August, 2016 | 10.7266/N7XP7385 |
| Nekton DB | Inventory of oceanic fauna data including species, weight, and measurements from R/V Point Sur (Cruise DP05) in the Gulf of Mexico from 2017-05-01 to 2017-05-11 | 10.7266/N7902234 |
| Cephalopod genetics | Cephalopod Genetic Data for the northern Gulf of Mexico 2018 | 10.7266/n7-dd3p-t155 |
| Cephalopod genetics | DEEPEND: raw ddRADseq data, in fastq format, for population genomic analysis of the cephalopod species Cranchia scabra, Pyroteuthis margaritifera, and Vampyroteuthis infernalis | 10.7266/n7-05f6-th15 |
| Cephalopod genetics | Mitochondrial and nuclear sequences for phylogenetic analysis of three cephalopod species, northern Gulf of Mexico, May 2015 to May 2017 | 10.7266/N7ZG6QQ9 |
| Crustacean genetics | 16S and COI barcoding sequences for crustaceans and cephalopods in the Gulf of Mexico and Florida Straits from 2015-2016 | 10.7266/N7XP73B2 |
| Crustacean genetics | 16S and COI barcoding sequences for crustaceans collected from the northern Gulf of Mexico for cruises DP02, DP03, and DP04 from August 2015 - August 2016 | 10.7266/N7HM56TD |
| Crustacean genetics | Annotated transcriptome and associated datasets of flatback mud crabs (Eurypanopeus depressus) exposed to dispersed oil | 10.7266/N71C1TZC |
| Crustacean genetics | DEEPEND: 16S and COI barcoding sequences for crustaceans and cephalopods collected from the Northern Gulf of Mexico for cruises DP05 and DP06 from Jan 2017 - December 2017 | 10.7266/n7-1xs7-4n30 |
| Crustacean genetics | DEEPEND: raw ddRADseq data, in fastq format, for comparative population genomic analysis of the mesopelagic shrimp species Acanthephyra purpurea, Systellaspis debilis, and Sergia robusta; as well as single-locus barcode sequences (16S ribosomal subunit and cytochrome c oxidase subunit I) for every individual included in the ddRADseq data set. | 10.7266/n7-3p3y-g470 |
| Crustacean genetics | DEEPEND: raw ddRADseq data, in fastq format, for population genomic analysis of the Gulf pink shrimp, Farfantepenaeus duorarum | 10.7266/n7-hhnq-kh83 |
| Crustacean genetics | DNA sequences for Penaeoidea phylogeny | 10.7266/N75M63Q3 |
| Crustacean genetics | Identifying Crustacean Adult-larval Linkages using Molecular Techniques | 10.7266/n7-c56k-dp86 |
| Crustacean genetics | Mitochondrial DNA sequence alignments and raw fastq files for the population genetic analysis of the deep sea isopod, Bathynomus giganteus | 10.7266/N7VX0F19 |
| Crustacean genetics | Mitochondrial DNA sequence alignments for phylogenetic analysis of the shrimp genus Farfantepenaeus | 10.7266/n7-9yq3-3177 |
| Fishes genetics | DEEPEND: DNA sequences of the mitochondrial Cytochrome c oxidase I (COI) genes from deep sea fishes. Additional data from all cruises: DP01 to DP06 January 2015 - December 2018. | 10.7266/n7-rg4t-2k74 |
| Fishes genetics | DEEPEND: Genetic diversity of deep sea fishes (Family: Myctophidae) from the Gulf of Mexico determined by genome-scale single nucleotide polymorphisms. Cruises DP01 through DP06 from May 2015 - December 2017 | 10.7266/n7-67wg-mz19 |
| Fishes genetics | DEEPEND: Genetic diversity of deep sea fishes from the Gulf of Mexico determined by genome-scale single nucleotide polymorphisms. Cruises DP01 through DP06 from May 2015 - December 2017 | 10.7266/n7-ws46-0612 |
| Fishes genetics | DNA sequences of mitochondrial Cytochrome c oxidase I (COI) genes from deep sea fishes collected during DEEPEND cruise DP05 from 2017-05-01 to 2017-05-11 | 10.7266/n7-rmfn-4d68 |
| Fishes genetics | DNA sequences of the mitochondrial Cytochrome c oxidase I (COI) genes from deep sea fishes, cruises DP03 and DP04 from May 2016 - August 2016 | 10.7266/N7GF0RW0 |
| Fishes genetics | DNA sequences of the mitochondrial Cytochrome c oxidase I (COI) genes from deep sea fishes. Cruises DP01 and DP02 from May 2015 - August 2015 | 10.7266/N7Z036HF |
| Fishes genetics | Genetic diversity of deep sea fishes (Sternoptyx diaphana, Cyclothone obscura, Argyropelecus aculeatus,Sternoptyx pseudobscura,Chauliodus sloani) from the Gulf of Mexico determined by genome-scale single nucleotide polymorphisms. Cruises DP01 through DP06 from May 2015 - December 2017 | 10.7266/n7-k9tp-y248 |
| Microbial genetics | DEEPEND: Microbiome and bacterioplankton rRNA gene sequence data collected from Gulf of Mexico seawater samples. Cruises DP05 May 2017. | 10.7266/n7-033n-s709 |
| Microbial genetics | Eukaryotic 18S rRNA Sequences as part of eDNA analyses of Diel Vertical Migration of Mixed Consortia in the Gulf of Mexico | 10.7266/n7-awwx-4g13 |
| Microbial genetics | Functional interpretation of Year 1 16S rRNA data using Phylogenetic Investigation of Communities by Reconstruction of Unobserved States (PICRUSt), pelagic Gulf of Mexico microbiomes, August 2015 | 10.7266/N79K48MZ |
| Microbial genetics | Microbiome and bacterioplankton rRNA gene sequence data collected from Gulf of Mexico seawater samples, Cruises DP01 and DP02 from May 2015 - August 2015 | 10.7266/N7P55KWX |
| Microbial genetics | Microbiome and bacterioplankton rRNA gene sequence data collected from Gulf of Mexico seawater samples, cruises DP03 and DP04 from April - August 2016 | 10.7266/N7833QCP |
| PAH | Composition and quantification of Polycyclic Aromatic Hydrocarbons in deep-pelagic fauna, cruises DP01 and DP02 from May 2015 - August 2015 | 10.7266/N7XD1026 |
| PAH | Composition and quantification of Polycyclic Aromatic Hydrocarbons in deep-pelagic fauna. Cruises DP02, DP03, and DP04 from August 2015 - August 2016 | 10.7266/N7QZ28B4 |
| PAH | DEEPEND: Composition and quantification of Polycyclic Aromatic Hydrocarbons in deep-pelagic fauna. Cruises DP05 and DP06 from January 2017 - December 2017 | 10.7266/n7-jxss-1s14 |
| SIA | DEEPEND: Stable isotope analyses of model species to examine marine food webs of the Gulf of Mexico. Cruises DP03, DP04, LF2016A and LF2016B from May 2016 - August 2016 | 10.7266/n7-bf8a-hq12 |
| SIA | DEEPEND: Trophic structure of micronekton in the Northern Gulf of Mexico using Stable Isotope Analysis, January 2018 - December 2018 | 10.7266/n7-bzef-0e24 |
| SIA | Stable isotope (13C/15N) data of meso- and bathypelagic nekton, northern Gulf of Mexico, March - September 2011 | 10.7266/N7ZS2V04 |
| SIA | Stable isotope ratios of model meso- and bathypelagic micronekton species of the Gulf of Mexico, cruises DP01, DP02, LF2015A and LF2015B from May 2015 - August 2015 | 10.7266/N75D8Q7Z |
| Chl a | Chlorophyll concentration and optical absorption spectra of particulate and dissolved material collected aboard the R/V Point Sur cruise DP06 from 2018-07-20 to 2018-08-01 | 10.7266/n7-3t9h-8p38 |
| Chl a | Chlorophyll concentration and optical absorption spectra of particulate and dissolved material, collected at several depths on DEEPEND cruises DP01 and DP02, May 2015 - Aug 2015 | 10.7266/N7319T92 |
| Chl a | Chlorophyll concentration and optical absorption spectra of particulate and dissolved material, collected at several depths on DEEPEND cruises DP03 and DP04 from January-December 2016 | 10.7266/N7ZP44GF |
| Chl a | Chlorophyll concentration and optical absorption spectra of particulate and dissolved material, collected at several depths on DEEPEND cruises DP05 from January-December 2017 | 10.7266/N73B5XHK |
| Optics | Near surface fluorescence and optical scattering profiles at CTD sampling stations, cruise DP05, May 2017 | 10.7266/N7TX3CQ8 |
| Optics | Near surface fluorescence and optical scattering profiles at CTD sampling stations, cruises DP03 and DP04 from January 2016 - December 2016 | 10.7266/N70Z71NN |
